# Supplementary material for: Sodium nanoferrite-based solid phase extraction: a green method for the simultaneous determination of cadmium, copper, and lead
Source: Royal Society of Chemistry journal article supplement (doi:10.1039/d4ja00210e), 2024-01-01
Supplement: d4ja00210e1.pdf [file d4ja00210e1.pdf]

**Sodium Nanoferrite-Based Solid Phase Extraction: A Green Method for Simultaneous  
Determination of Cadmium, Copper, and Lead**

Saima Perveen<sup>1,2</sup>, Aysen Hol<sup>2</sup>, Jameel Ahmed Baig<sup>\*3,1</sup>, Syed Tufail Hussain Sherazi<sup>1</sup>, Khalil Akhtar<sup>1</sup>, Sajjad Hussain<sup>4</sup>, Fahad Abbasi<sup>5</sup>

<sup>1</sup>*Centre of Excellence in Analytical Chemistry, University of Sindh, Jamshoro 76080, Pakistan*

<sup>2</sup>*Chemistry Department, Pamukkale University, Denizli 20017, Turkey*

<sup>3</sup>*Chemistry Department, College of Science, Imam Mohammad Ibn Saud Islamic University (IMSIU), PO Box, 90950, Riyadh 11623, Saudi Arabia*

<sup>4</sup>*Centre of Excellence in Solid State Physics, University of the Punjab, Lahore, 05422, Pakistan*

<sup>5</sup>*Dr. M.A Kazi Institute of Chemistry, University of Sindh, Jamshoro 76080, Pakistan*

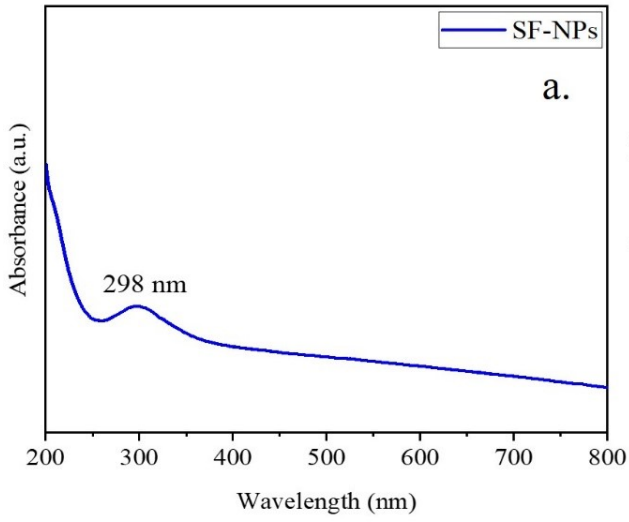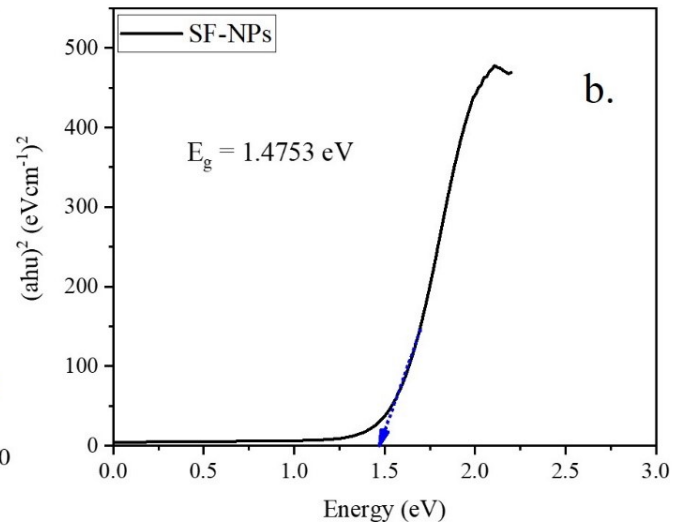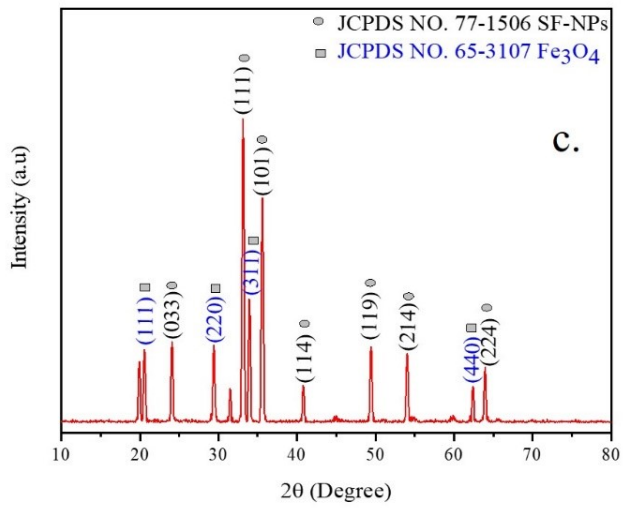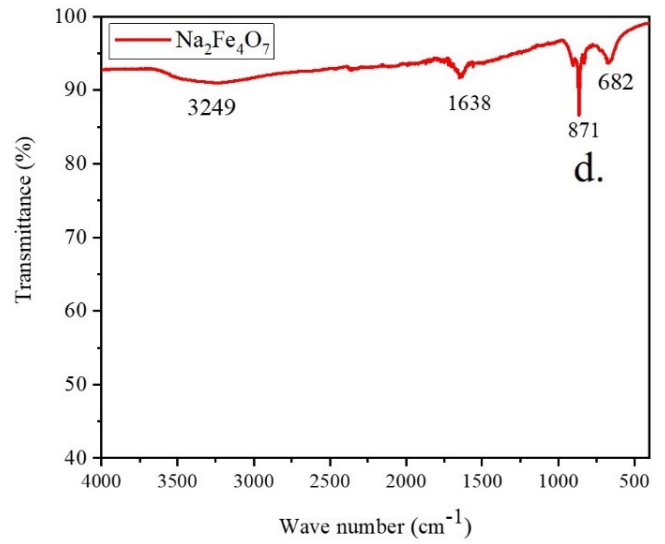

**S.1: a.** UV-visible **b.** Band gap energy **c.** XRD and **d.** FT-IR spectrum of synthesized SF-NPs.

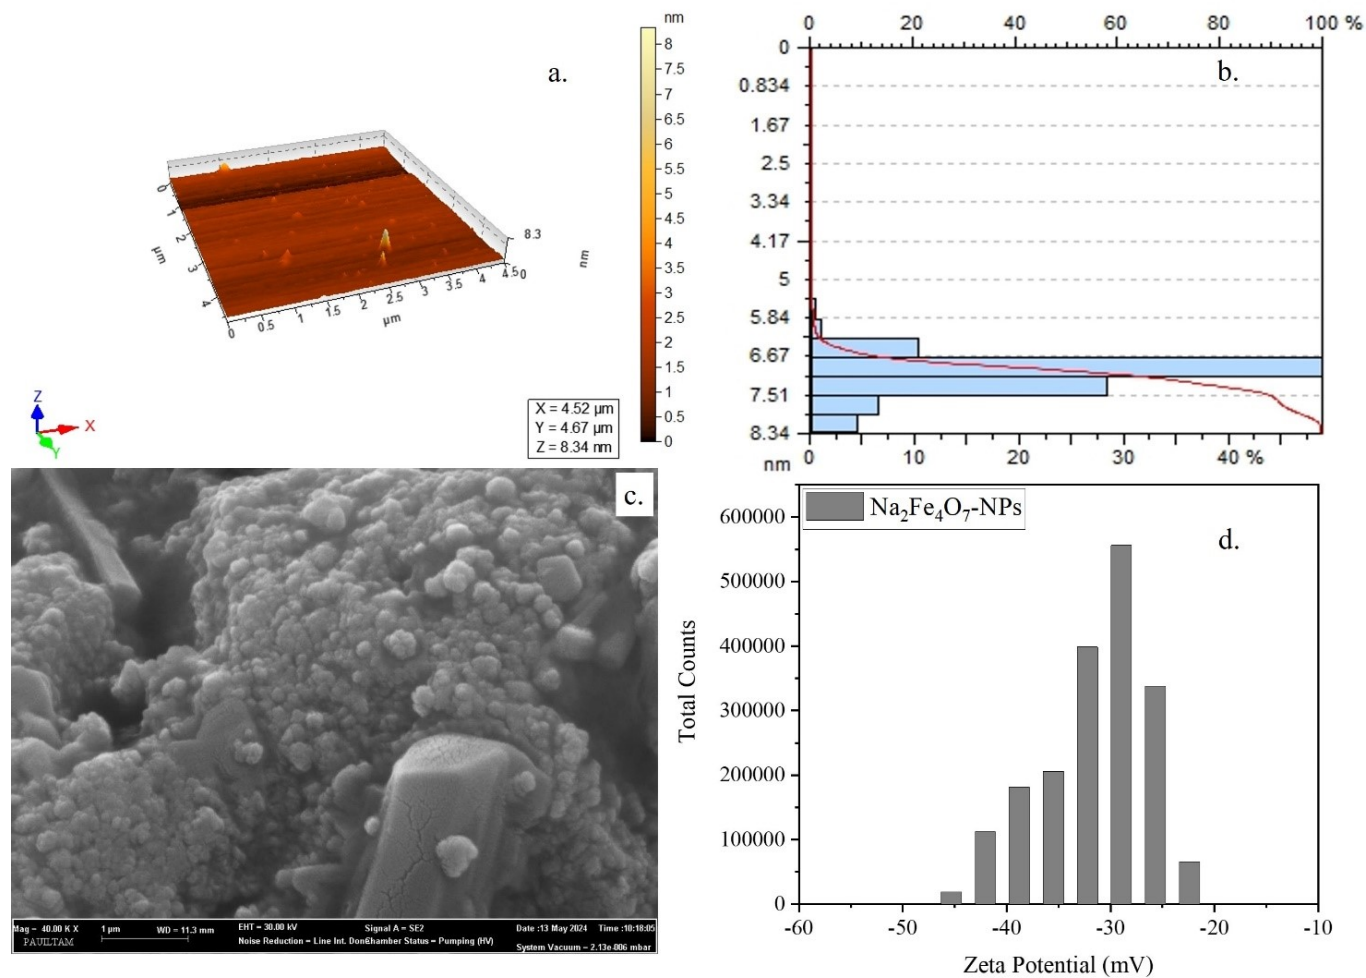

**S2: a.** AFM 3D Topography **b.** AFM size distribution bar graph, **c.** FESEM image, and **d.** electro-kinetic potential of SF-NPs.
